# Supplementary material
Source: publisher figshare collection journal article supplement (https://sage.figshare.com/ndownloader/files/16258919)
Supplement: Supplementary file 1 [file 16258919]

## Appendix A: Hand-Searched Journals

|                           |                                                                                                                                                                                                                                                                                                                                                                                                                                                                                                                                                                                                                                                                                                                                                                                                                                                                                                                                                                                                                                                                                                                                                                                                                                                                             |
|---------------------------|-----------------------------------------------------------------------------------------------------------------------------------------------------------------------------------------------------------------------------------------------------------------------------------------------------------------------------------------------------------------------------------------------------------------------------------------------------------------------------------------------------------------------------------------------------------------------------------------------------------------------------------------------------------------------------------------------------------------------------------------------------------------------------------------------------------------------------------------------------------------------------------------------------------------------------------------------------------------------------------------------------------------------------------------------------------------------------------------------------------------------------------------------------------------------------------------------------------------------------------------------------------------------------|
| Journals ( <i>n</i> =335) | <ul style="list-style-type: none"> <li>• American Journal of Mental Retardation (<i>n</i>=1)</li> <li>• American Journal of Speech-Language Pathology (<i>n</i>=15)</li> <li>• Augmentative and Alternative Communication (<i>n</i>=2)</li> <li>• The Behavior Analyst Today (<i>n</i>=10)</li> <li>• Behavior Modification (<i>n</i>=21)</li> <li>• Behavior Therapy (<i>n</i>=12)</li> <li>• Behavioral Disorders (<i>n</i>=11)</li> <li>• Education and Treatment of Children (<i>n</i>=22)</li> <li>• Exceptional Children (<i>n</i>=22)</li> <li>• Journal of Autism and Developmental Disorders (<i>n</i>=3 )</li> <li>• Journal of Behavioral Education (<i>n</i>=10)</li> <li>• Journal of Clinical Epidemiology (<i>n</i>=0)</li> <li>• Journal of School Psychology (<i>n</i>=1)</li> <li>• Journal of Special Education (<i>n</i>=6)</li> <li>• Learning Disability Quarterly (<i>n</i>=78)</li> <li>• Neuropsychological Rehabilitation (<i>n</i>=0)</li> <li>• Remedial and Special Education (<i>n</i>=27)</li> <li>• Research in Autism Spectrum Disorders (<i>n</i>=3)</li> <li>• Research in Developmental Disabilities (<i>n</i>=18)</li> <li>• Review of Educational Research (<i>n</i>=61)</li> <li>• School Psychology Review (<i>n</i>=12)</li> </ul> |
|---------------------------|-----------------------------------------------------------------------------------------------------------------------------------------------------------------------------------------------------------------------------------------------------------------------------------------------------------------------------------------------------------------------------------------------------------------------------------------------------------------------------------------------------------------------------------------------------------------------------------------------------------------------------------------------------------------------------------------------------------------------------------------------------------------------------------------------------------------------------------------------------------------------------------------------------------------------------------------------------------------------------------------------------------------------------------------------------------------------------------------------------------------------------------------------------------------------------------------------------------------------------------------------------------------------------|

Note. *n* refers to the number of articles.
